# Supplementary material for: Sustainable pretreatment of blood samples using hydrophobic eutectic solvents to improve the detection of bisphenol A
Source: Royal Society of Chemistry journal article supplement (doi:10.1039/d4gc03396e), 2024-11-13
Supplement: d4gc03396e1.pdf [file d4gc03396e1.pdf]

## Electronic Supporting Information (ESI)

### Sustainable pretreatment of blood samples using hydrophobic eutectic solvents to improve the detection of bisphenol A

Cariny Polesca<sup>a</sup>, Helena Passos<sup>a,b,c</sup>, Ana C. A. Sousa<sup>d,e,\*</sup>, Nguyen Minh Tue<sup>e</sup>, João A. P. Coutinho<sup>a</sup>, Tatsuya Kunisue<sup>e</sup>, Mara G. Freire<sup>a,\*</sup>

<sup>1</sup> CICECO - Aveiro Institute of Materials, Department of Chemistry, University of Aveiro, 3810-193 Aveiro, Portugal

<sup>2</sup> LSRE-LCM – Laboratory of Separation and Reaction Engineering – Laboratory of Catalysis and Materials, Faculty of Engineering, University of Porto, Porto, Portugal

<sup>3</sup> ALiCE – Associate Laboratory in Chemical Engineering, Faculty of Engineering, University of Porto, Porto, Portugal

<sup>4</sup> Comprehensive Health Research Centre (CHRC), Department of Biology, School of Science and Technology, University of Évora, 7006-554 Évora, Portugal

<sup>5</sup> Center for Marine Environmental Studies (CMES), Ehime University, Bunkyo-cho 2-5, Matsuyama, 790-8577, Ehime, Japan

\*e-mail of the corresponding author: [maragfreire@ua.pt](mailto:maragfreire@ua.pt) and [acsousa@uevora.pt](mailto:acsousa@uevora.pt)

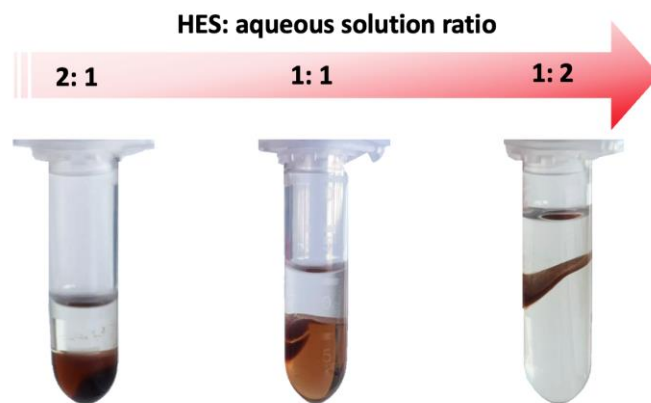

**Figure S1.** Influence of HES: aqueous solution ratio on blood precipitation.

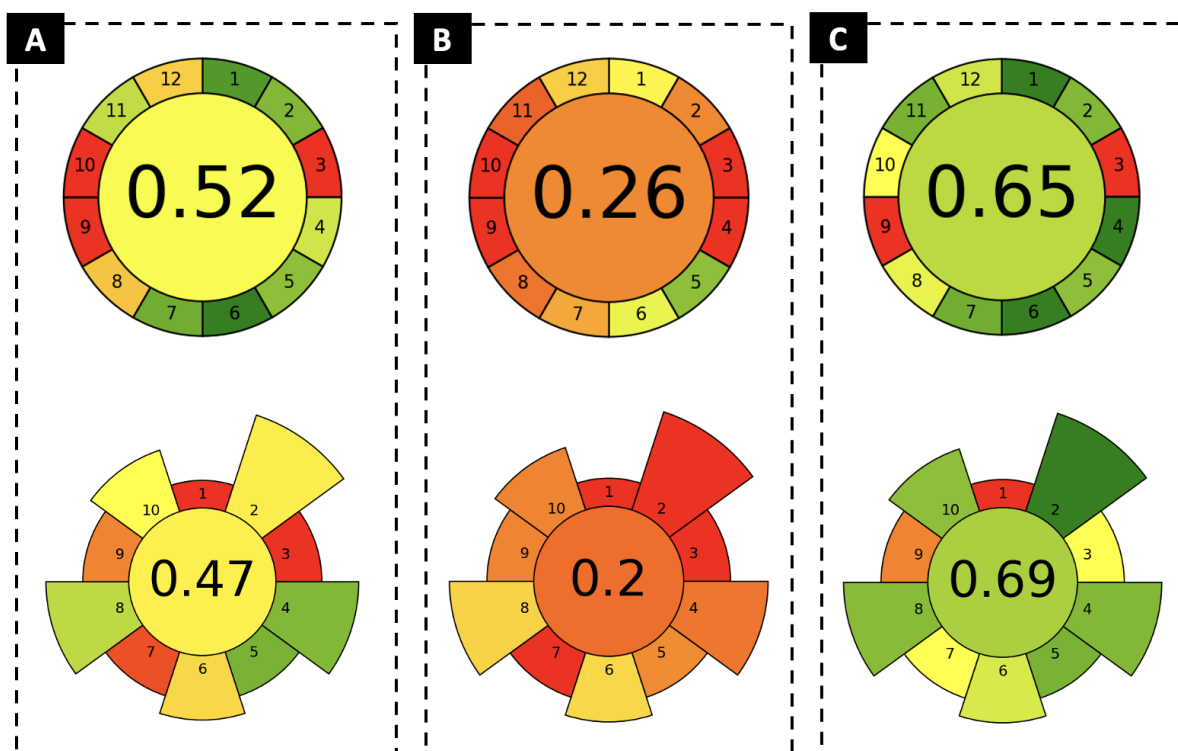

**Figure S2.** Diagrams obtained in the greenness assessment of representative reported methods for determining BPA using AGREE and AGREEprep metrics: (A) [36], (B) [13] and (C) the developed HES-TPP system considering a decrease in sample size.

**Table S1.** Compounds used in this work for HES preparation, water solubility, and hydrophobicity.

| <b>Compound</b>             | <b>Water solubility (g·L<sup>-1</sup>) [35]</b> | <b>Hydrophobicity (Log Kow) [23]</b> |
|-----------------------------|-------------------------------------------------|--------------------------------------|
| Thymol (TH)                 | 0.8                                             | 3.28                                 |
| L-menthol (M)               | 0.4                                             | 3.19                                 |
| Benzyl alcohol (BE)         | 40                                              | 1.10                                 |
| Cyclohexanol (C)            | 37.6                                            | 1.23                                 |
| Decanoic acid (DE)          | 0.06                                            | 4.09                                 |
| Trioctylphosphine oxide (T) | Insoluble                                       | 9.76                                 |

**Table S2.** Percentage extraction efficiencies of BPA ( $E_{BPA}$  %) using different HES and HES mole ratios.

| <b>HES</b> | <b>HES mole ratios</b> | <b><math>E_{BPA}</math> (%)</b> |
|------------|------------------------|---------------------------------|
| TH:M       | 0.2:0.8                | 88 ± 2                          |
|            | 0.3:0.7                | 87 ± 1                          |
|            | 0.5:0.5                | 88 ± 2                          |
|            | 0.65:0.35              | 55 ± 3                          |
| BE:C       | 0.2:0.8                | 88 ± 2                          |
|            | 0.3:0.7                | 90 ± 3                          |
|            | 0.5:0.5                | 91 ± 4                          |
|            | 0.65:0.35              | 89 ± 3                          |
| DE:T       | 0.5:0.5                | 74 ± 4                          |

**Table S3.** Percentage extraction efficiencies of BPA ( $E_{BPA}$  %) using different HES:aqueous solution ratios as obtained with UV measurement.

| <b>HES</b> | <b>HES:aq sol ratio (w/w)</b> | <b><math>E_{BPA}</math> (%)</b> |
|------------|-------------------------------|---------------------------------|
| TH:M       | 1:2                           | 68 ± 4                          |
|            | 1:1                           | 88 ± 2                          |
|            | 2:1                           | 88 ± 1                          |
| BE:C       | 1:2                           | 37 ± 4                          |
|            | 1:1                           | 91 ± 4                          |
|            | 2:1                           | 82 ± 3                          |
| DE:T       | 1:2                           | 53 ± 2                          |
|            | 1:1                           | 74 ± 4                          |
|            | 2:1                           | 92 ± 3                          |

**Table S4.** Percentage extraction efficiencies of BPA ( $E_{BPA}$  %) using BE:C (0.5: 0.5 mol/mol) at different times.

| <b>Time (min)</b> | <b><math>E_{BPA}</math> (%)</b> |
|-------------------|---------------------------------|
| 2                 | $7 \pm 1$                       |
| 5                 | $26 \pm 2$                      |
| 10                | $29 \pm 4$                      |
| 15                | $54 \pm 4$                      |
| 20                | $54 \pm 1$                      |

**Table S5.** Percentage extraction efficiencies of BPA ( $E_{BPA}$  %) using different HES types as obtained with UV measurement.

| <b>HES</b> | <b><math>E_{BPA}</math> (%)</b> |                 |
|------------|---------------------------------|-----------------|
|            | <b>Blood 1*</b>                 | <b>Blood 2*</b> |
| TH:M       | $76 \pm 2$                      | $76 \pm 3$      |
| BE:C       | $54 \pm 4$                      | $57 \pm 2$      |
| DE:T       | $69 \pm 2$                      | $63 \pm 7$      |

\* The results were obtained with different blood samples, with the aim of confirming the reproducibility of the process.

**Table S6.** Percentage extraction efficiencies of BPA ( $E_{BPA}$  %) from water and blood as obtained by LC-MS/MS analysis.

| <b>HES</b> | <b>Blood</b> | <b><math>E_{BPA}</math> (%)</b> |
|------------|--------------|---------------------------------|
| TH:M       | No           | $96 \pm 2$                      |
|            | Yes          | $84 \pm 1$                      |
| BE:C       | No           | $98 \pm 3$                      |
|            | Yes          | $99 \pm 3$                      |

## References (ESI)

- [13] T. Geens, H. Neels, A. Covaci, *Chemosphere*, 2012, 87, 796–802.
- [23] ChemSpider, (2023). <https://www.chemspider.com/> (accessed November 3, 2023).
- [35] Merk, Sigma-Aldrich, (2023). <https://www.sigmaaldrich.com/PT/en/product/aldrich/w266590>,

(accessed 2 April 2024).

- [36] I.A. Wiraagni, M.A. Mohd, R. bin A. Rashid, D.E. bin Mohamad Haron, *PLoS One* 2019, 14.
